# Supplementary material for: Urinary UPLC-MS metabolomics dissecting the underlying mechanisms of Huaxian capsule protects against sepsis
Source: Royal Society of Chemistry journal article supplement (doi:10.1039/c6ra07987c), 2016-01-01
Supplement: c6ra07987c1.pdf [file c6ra07987c1.pdf]

**Table S1.** Kyoto Encyclopedia of Genes and Genomes (KEGG) pathway analysis with MetPA.

| No | Pathway Name                                        | Total | Expected | Hits | Raw p  | Impact |
|----|-----------------------------------------------------|-------|----------|------|--------|--------|
| 1  | Phenylalanine, tyrosine and tryptophan biosynthesis | 4     | 0.0285   | 1    | 0.0283 | 0.5000 |
| 2  | Valine, leucine and isoleucine biosynthesis         | 11    | 0.0785   | 1    | 0.0760 | 0.3333 |
| 3  | Glycine, serine and threonine metabolism            | 32    | 0.2283   | 1    | 0.2068 | 0.2920 |
| 4  | Tyrosine metabolism                                 | 42    | 0.2996   | 2    | 0.0339 | 0.1416 |
| 5  | Primary bile acid biosynthesis                      | 46    | 0.3281   | 1    | 0.2845 | 0.0298 |
| 6  | Tryptophan metabolism                               | 41    | 0.2924   | 3    | 0.0024 | 0.0166 |
| 7  | Glutathione metabolism                              | 26    | 0.1855   | 1    | 0.1712 | 0.0057 |
| 8  | Aminoacyl-tRNA biosynthesis                         | 67    | 0.4779   | 3    | 0.0098 | 0      |
| 9  | Ubiquinone and other terpenoid-quinone biosynthesis | 3     | 0.0214   | 1    | 0.0213 | 0      |
| 10 | Cyanoamino acid metabolism                          | 6     | 0.0428   | 1    | 0.0421 | 0      |
| 11 | Phenylalanine metabolism                            | 9     | 0.0642   | 1    | 0.0626 | 0      |
| 12 | Methane metabolism                                  | 9     | 0.0642   | 1    | 0.0626 | 0      |
| 13 | Nitrogen metabolism                                 | 9     | 0.0642   | 1    | 0.0626 | 0      |
| 14 | Porphyrin and chlorophyll metabolism                | 27    | 0.1926   | 1    | 0.1772 | 0      |
| 15 | Amino sugar and nucleotide sugar metabolism         | 37    | 0.2639   | 1    | 0.2353 | 0      |
| 16 | Valine, leucine and isoleucine degradation          | 38    | 0.2710   | 1    | 0.2409 | 0      |

Note: Total is the total number of compounds in the pathway; the Hits is the actually matched number from the user uploaded data; the Impact is the pathway impact value calculated from pathway topology analysis.

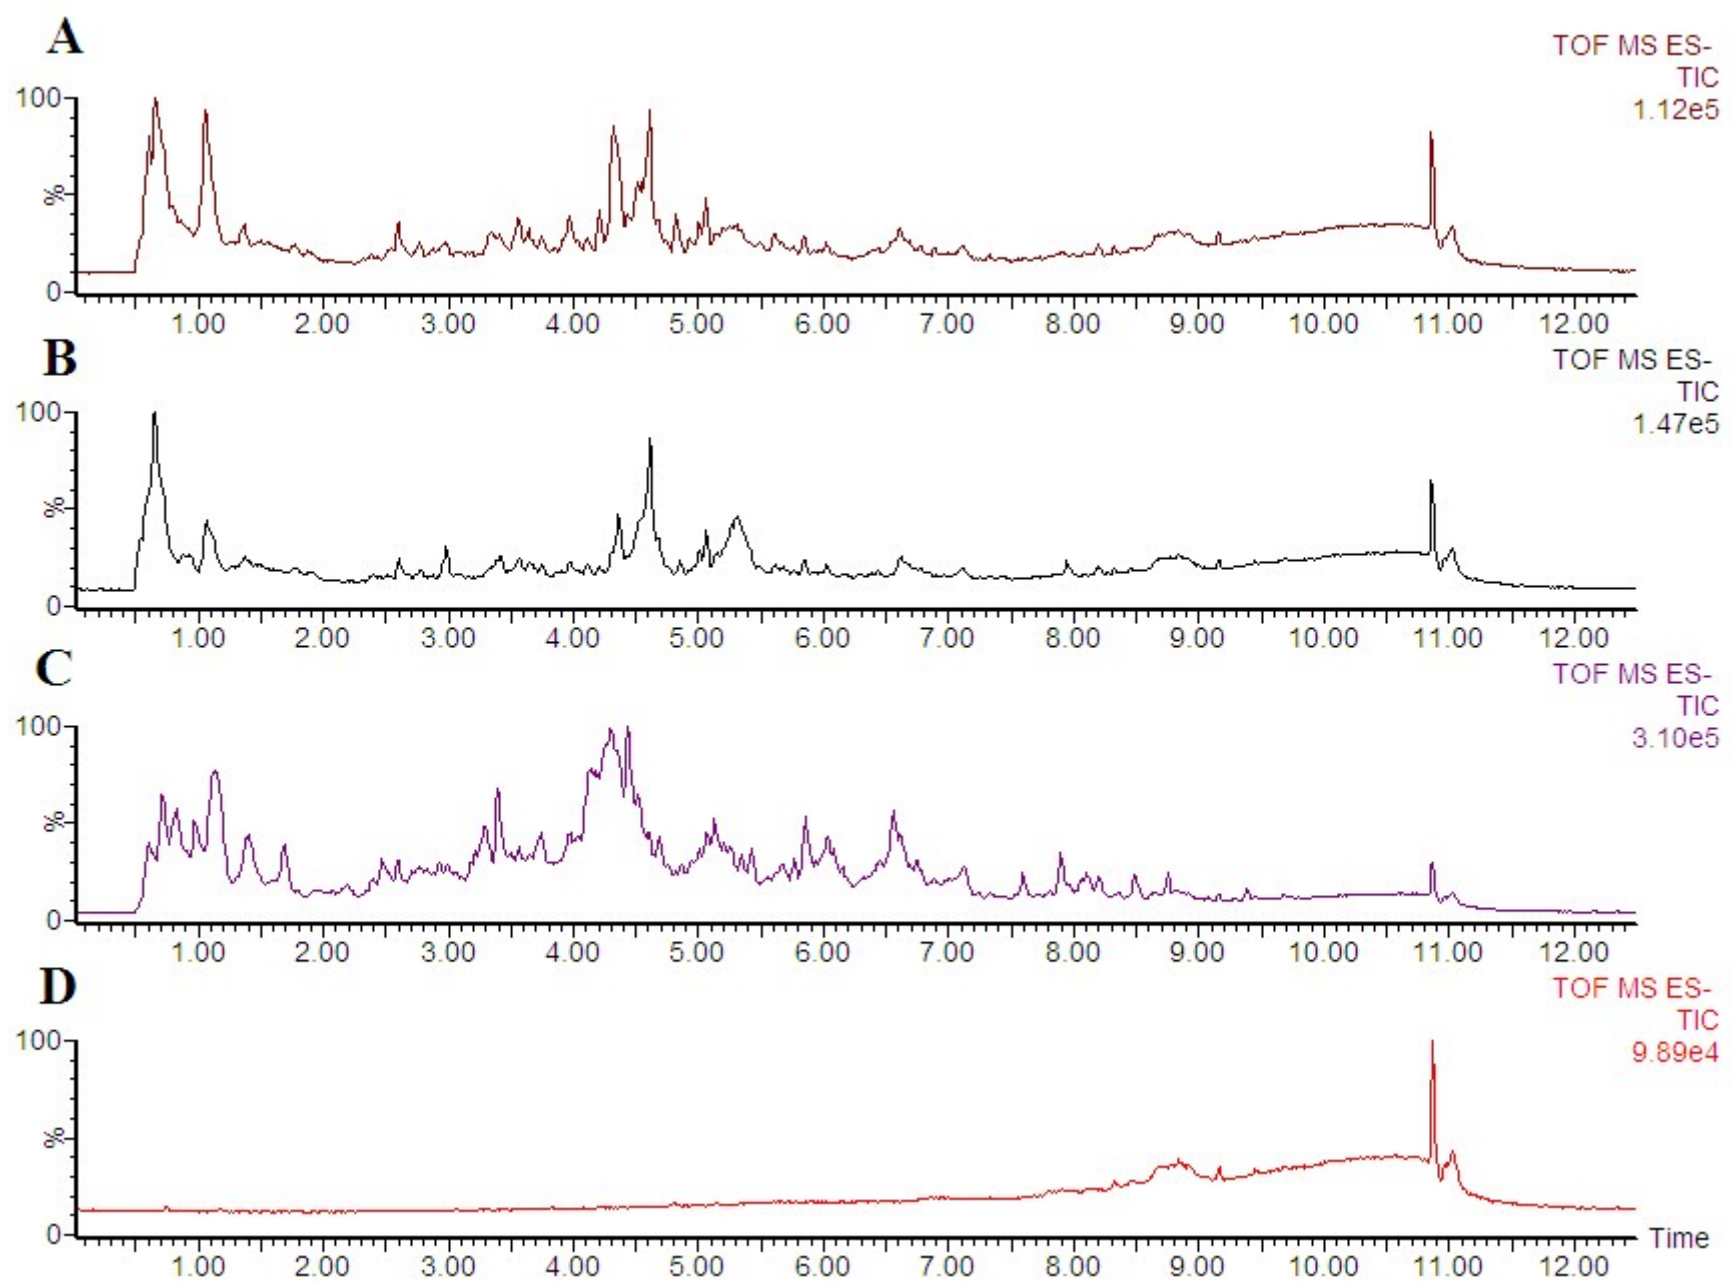

**Fig. S1.** Representative UPLC/MS spectra of urine samples.

Note: A, control group; B, model group; C, HXC group (ESI mode), D, black samples.
